# Supplementary material for: Atomic layer deposition of SnSex thin films using Sn(N(CH3)2)4 and Se(Si(CH3)3)2 with NH3 co-injection
Source: Royal Society of Chemistry journal article supplement (doi:10.1039/d1dt03487a), 2021-12-06
Supplement: d1dt03487a1.pdf [file d1dt03487a1.pdf]

## Electronic Supplementary Information (ESI)

### Atomic layer deposition of $\text{SnSe}_x$ thin films using $\text{Sn}(\text{N}(\text{CH}_3)_2)_4$ and $\text{Se}(\text{Si}(\text{CH}_3)_3)_2$ with $\text{NH}_3$ co-injection

Jeong Woo Jeon,<sup>a</sup> Chanyoung Yoo,<sup>a</sup> Woohyun Kim,<sup>a</sup> Wonho Choi,<sup>a</sup> Byongwoo Park,<sup>a</sup> Yoon Kyeong Lee<sup>\*b</sup> and Cheol Seong Hwang<sup>\*a</sup>

<sup>a</sup>*Department of Materials Science and Engineering and Inter-University Semiconductor Research Center, Seoul National University, Seoul, Republic of Korea. E-mail: cheolsh@snu.ac.kr*

<sup>b</sup>*Division of Advanced Materials Engineering, Jeonbuk National University, Jeonju, 54896, Republic of Korea. E-mail: yoonklee@jbnu.ac.kr*

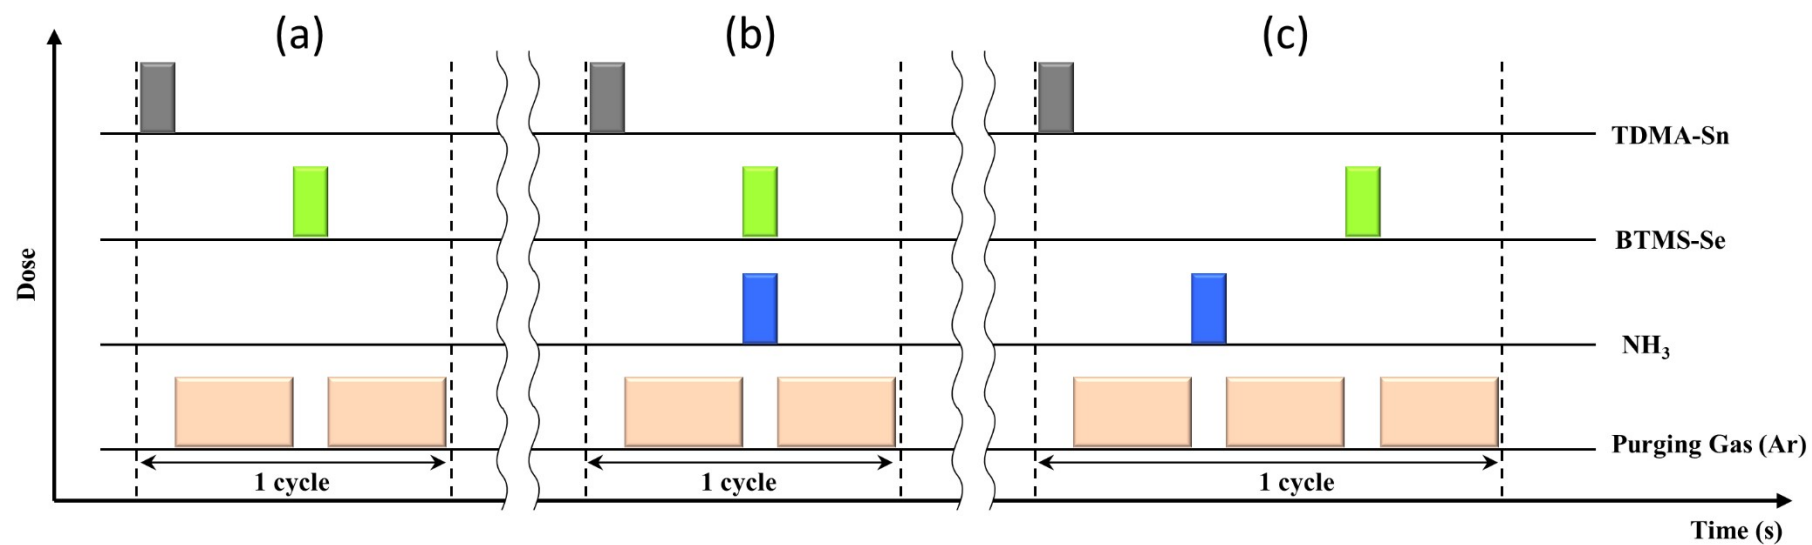

**Fig. S1** Various ALD gas injection sequences with NH<sub>3</sub> to analyze the chemical interactions between NH<sub>3</sub> and the precursors. (a) Typical ALD (b) Synchronized injection of NH<sub>3</sub> with BTMS-Se (c) Asynchronous injection of NH<sub>3</sub> with BTMS-Se.

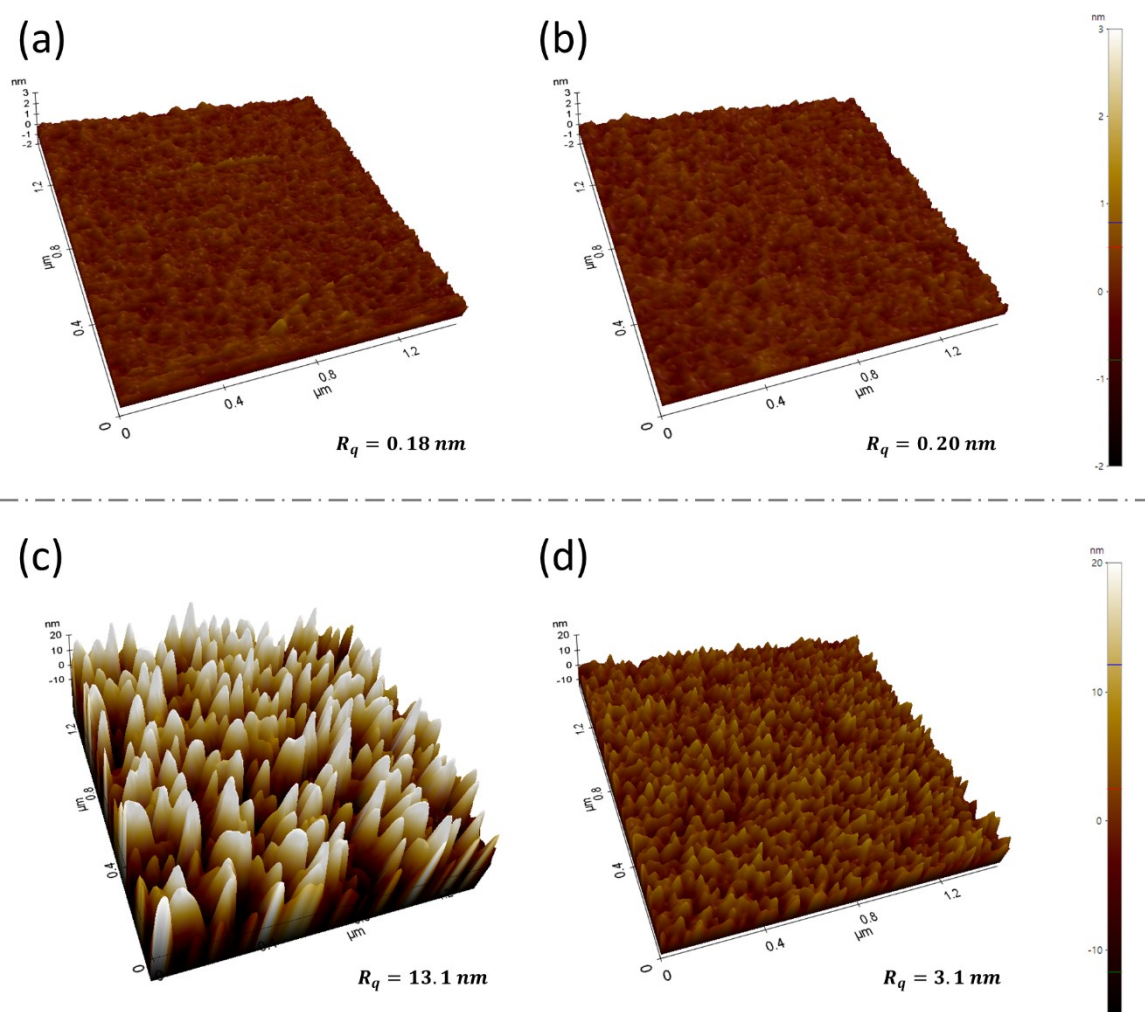

**Fig. S2** AFM images of  $\text{SnSe}_x$  films grown on  $\text{SiO}_2$  substrate at deposition temperatures of (a) 110 °C, (b) 150 °C, (c) 170 °C, and (d) 170 °C with two-step process.

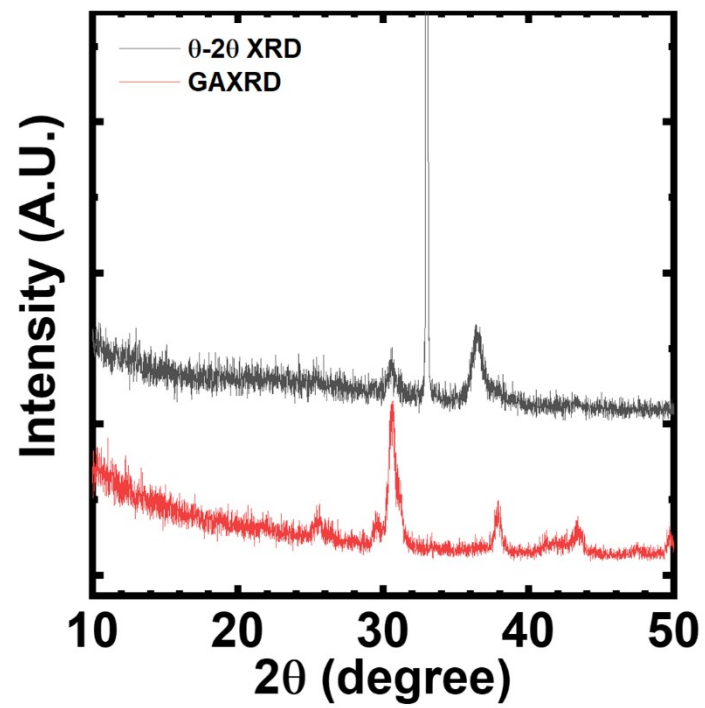

**Fig. S3**  $\theta$ - $2\theta$  and GAXRD results of SnSe film on TiN substrates with the two-step process
